# Supplementary material for: Evolutionary Implications of a Peroxidase with High Affinity for Cinnamyl Alcohols from Physcomitrium patens, a Non-Vascular Plant
Source: MDPI journal article supplement (doi:10.3390/plants10071476), 2021-07-19
Supplement: s1 [file s1]

Title: Evolutionary implications of a peroxidase with high affinity for cinnamyl alcohols from *Physcomitrium patens*, a non-vascular plant

Authors: Teresa Martínez-Cortés, Federico Pomar and Esther Novo-Uzal

**Figure S1.** Effect of abiotic stress on *PpaPrx19* gene expression. 18S was used as housekeeping gene. Values are mean  $\pm$  SD ( $n = 3$  independent experiments), asterisks indicate statistical differences (t-student,  $p < 0.05$ ) with control.

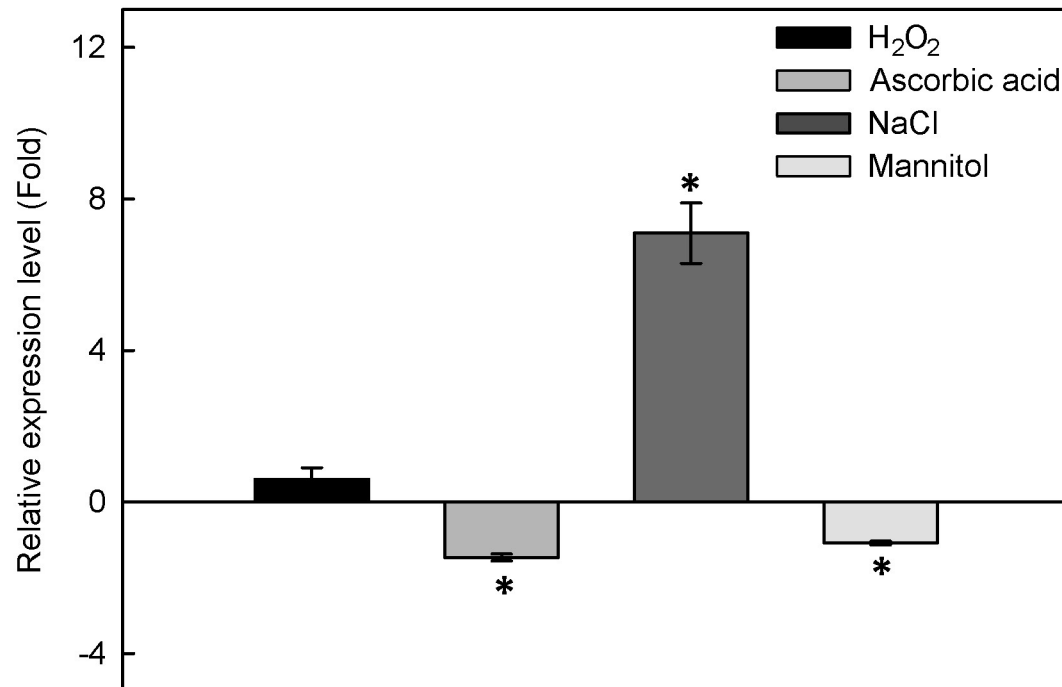

**Figure S2.** Graphical representation of the proteins PpaPrx9 (PP1S306\_37V6.1) has interaction with, retrieved from STRING

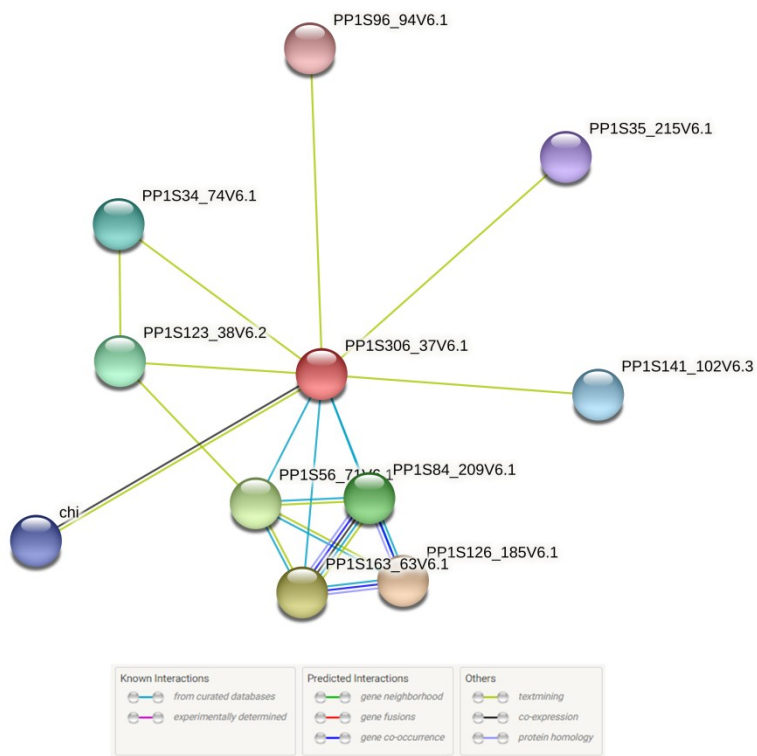

Table S1. List of coexpression pattern obtain for PpaPrx19 in Phytozome (<https://phytozome.jgi.doe.gov/pz/portal.html>)

| <i>P. patens</i> ID | Protein                                               | Correlation |
|---------------------|-------------------------------------------------------|-------------|
| Pp3c2_18040         | Ancient ubiquitous protein 1                          | 0.937       |
| Pp3c7_5330          | Leucine Rich Repeat (LRR_1)                           | 0.921       |
| Pp3c15_640          | Auxin influx carrier (AUX1 LAX family)                | 0.883       |
| Pp3c17_5130         | beta-1,3-glucanase 1-related                          | 0.877       |
| Pp3c1_18680         | Phenylalanine ammonia-lyase (PAL)                     | 0.867       |
| Pp3c8_5110          | WRKY DNA -binding domain (WRKY)                       | 0.860       |
| Pp3c1_29970         | Exostosin heparan sulfate glycosyltransferase-related | 0.856       |
